# Supplementary material for: Drivers of disinfection byproduct formation and speciation in small, chlorinated coastal groundwater systems: relative roles of bromide and organic matter, and the need for improved source water characterization and monitoring
Source: Royal Society of Chemistry journal article supplement (doi:10.1039/d0ew00663g), 2020-01-01
Supplement: d0ew00663g1.pdf [file d0ew00663g1.pdf]

1 **Electronic Supplementary Information: Drivers of Disinfection Byproduct**  
2 **Formation and Speciation in Small, Chlorinated Coastal Groundwater Systems:**  
3 **Relative Roles of Bromide and Organic Matter, and the Need for Improved Source**  
4 **Water Characterization and Monitoring**  
5

6 **Text S1. ATP Analyses.**

7 Concentrations of adenosine triphosphate (ATP) – a semi-quantitative indicator of  
8 metabolically-active microbial cells – were measured using a commercially-available  
9 luminescence assay kit (BacTiter-Glo™; Promega), in accordance with reported procedures.<sup>1</sup>  
10 Luminescence measurements were obtained using a Perkin-Elmer Victor3 V microplate reader,  
11 with sample reactions conducted in flat-bottomed, opaque white plastic microplates. Total  
12 (ATP<sub>total</sub>), extracellular (ATP<sub>extra</sub>), and intracellular (ATP<sub>intra</sub>) ATP concentrations were  
13 distinguished by performing complementary measurements of ATP in whole samples (ATP<sub>total</sub>)  
14 and samples filtered through pre-sterilized 0.1 µm PES syringe filters (ATP<sub>extra</sub>), where ATP<sub>intra</sub>  
15 = ATP<sub>total</sub> – ATP<sub>extra</sub>, with all measurements corrected for negative control background signals  
16 (autoclaved water).  
17

18 **Text S2. PARAFAC Analysis.**

19 The PARAFAC analyses were undertaken on the composite set of Island and San Juan  
20 County samples (n = 79) using the DOMFluor toolbox (version 1.7) developed by Stedmon and  
21 Bro (available at [www.models.life.ku.dk/algorithms](http://www.models.life.ku.dk/algorithms)).<sup>2</sup> Data was first pre-processed to null data  
22 at wavelengths influenced by peak scattering, ensuring removal of Rayleigh and Raman  
23 scattering influences from all samples. Five models were fit to the data, with the number of  
24 components ranging from 2-7. All components were constrained to be non-negative values. The  
25 data set was checked for outliers and to establish a range of components to evaluate when

26 building the PARAFAC Model. Samples were considered possible outliers if their leverage in  
27 the model was high, indicating an extreme sample with unique EEM shape that was altering the  
28 model significantly. The following samples were excluded from the final analyses due to high  
29 leverage: Q1 IC07 treated, Q2 IC06 raw, and Q4 IC08 raw. The 5 models were then evaluated  
30 with the smaller data set ( $n = 76$ ).

31 The excitation and emission plots generated for the components identified in each model  
32 were visually inspected to determine if components exhibited smooth EEMs with appearances  
33 similar to literature-defined natural organic matter components. Models with 6 or more  
34 components yielded several component EEMs exhibiting high noise, which did not contribute  
35 significantly to the aggregate fluorescence EEMs. The models were also evaluated by visually  
36 inspecting the residual EEMs generated by subtraction of sample EEMs from the corresponding  
37 modeled EEMs (generated by superposition of all modeled component EEMs for a given  
38 sample). For the 2-component model, recurring patterns were identifiable in the residual EEMs  
39 for many of the samples, indicating that the model did not appropriately fit to the data, likely due  
40 to oversimplification (underdetermination) of the model.

41 The remaining 3- to 5-component models were evaluated by performing half-split  
42 analysis and validation via the DOMFluor toolbox.<sup>2</sup> Briefly, the data were split into quarters and  
43 the quarters combined to complete two separate split analyses for each set. The two halves of  
44 each dataset were fit to the 3- to 5-component models and compared to each other as a validation  
45 step (where for a satisfactory model, the two halves should exhibit similar excitation and  
46 emission profiles for each component). The DOMFluor toolbox compares the excitation and  
47 emission curves for each model mathematically using Tucker Congruence Coefficients, and  
48 reports whether the models are robust and the component EEMs from each half are matching.

49 The 5-component model did not pass the validation step. Because the sum of the squared error  
50 was lower for the 4-component model as compared to the 3-component model, the 4-component  
51 model was selected as the most appropriate model for PARAFAC analyses of the study data sets.

52 The model uses an alternating least squares regression to fit the data, which can be  
53 influenced by selection of initial conditions. To validate the least squares model fit, the 4-  
54 component model was fit to the entire data set with random initialization parameters. Twenty 4-  
55 component models were randomly initialized and modeled. All yielded similar squared error  
56 residuals, verifying the robustness and accuracy of the 4-component model.

57 Following identification of the most appropriate PARAFAC model,  $F_{\max}$  values  
58 (maximum fluorescence intensities, in arbitrary units) were determined for the four components  
59 in each sample for comparison with observed DBP formation potentials, DOC levels, and  
60 selected DOM properties.

61 Characteristic excitation and emission maxima are summarized for each component in  
62 Table S2, along with descriptions of the character and origin typically ascribed to similar  
63 components in the literature, their potential relevance to DBP formation, and identifiers used for  
64 similar components by other investigators. Figure S7 includes an example EEM, color contour  
65 visualizations of Components 1-4, and  $F_{\max}$  values for Component 1 ( $F_{\max 1}$ ) for all sites over the  
66 study period.

67

### 68 **Text S3. Additional Source Water Characteristics.**

69 *pH*. The range of raw water pH measured was 6.8 – 7.8 for IC sources and 7.3 – 8.2 for  
70 SJC sources (Table 1). pH increased for IC sources (ranging from 7.1 – 8.3) following full-scale  
71 chlorination (in addition to softening and/or iron/manganese removal for IC06, IC07, and IC08).

72 *Total Dissolved Solids and Conductivity.* Levels of TDS and conductivity varied from  
73 210 – 730 mg/L and 390 – 1,200 mhos/cm, respectively, across the dataset (Table 1), with  
74 generally strong positive correlation ( $R^2 = 0.79$ ) between the two parameters (Figure S2). The  
75 upper values observed for each of these parameters are consistent with the relatively high  
76 chloride and bromide levels observed for a number of sites, and indicate possible influence of  
77 seawater intrusion on their water supplies.

78 *Ammonia Concentrations.* Ammonia varied widely across the dataset, with  $\text{NH}_3\text{-N}$   
79 concentrations ranging from below the detection limit (0.005 mg/L) to 3.2 mg/L in the IC  
80 samples, whereas lower values (<0.005 – 0.187 mg/L) were measured in SJC samples (Table 1).  
81 The relatively high levels of  $\text{NH}_3\text{-N}$  in the IC dataset are likely indicative of reducing conditions  
82 in the groundwaters for a number of these sites, consistent with the occurrence of reduced  
83 manganese and iron in the IC06, IC07, and IC08 waters,<sup>3</sup> though agricultural or septic field  
84 infiltration into recharge zones may also be a contributing factor. Ammonia levels appeared to  
85 vary seasonally in several IC systems, with substantially higher levels in Q1 for IC05 Source02  
86 and Source03 and IC08, and during Q1 and Q2 for IC06 and IC07. These trends do not exhibit a  
87 general correlation with expected changes in climate (i.e., dry vs. rainy season); hence, this does  
88 not appear to be a precipitation-driven trend. Sites with high ammonia concentrations also  
89 exhibited high free chlorine demands in 7-day DBP-FP tests, though DBP-FPs did not correlate  
90 with  $\text{NH}_3\text{-N}$ , as all formation potential tests were conducted so that free chlorine concentrations  
91 added to samples surpassed breakpoint. The presence of high  $\text{NH}_3\text{-N}$  levels could nevertheless  
92 play an important role under full-scale treatment conditions at the studied sites if the breakpoint  
93 is not exceeded, as formation of combined chlorine could inhibit formation of DBPs (as well as  
94 efficacy of disinfection). This warrants careful consideration by utilities in selecting the levels of

95 chlorine applied to the source waters at the monitored groundwater sites.

96 *Heterotrophic Plate Count and ATP.* HPC levels were below detection limits (< 1

97 CFU/mL) for the majority of samples collected during the study, with the exception of IC01, in

98 which HPC values ranged from 4.5 – 60.5 CFU/mL. Consistent with prior observations,<sup>1</sup> HPC

99 measurements exhibited no general correlation with total or intracellular ATP concentrations.

100 Levels of ATP were quite low in nearly all samples ( $\text{ATP}_{\text{total}} < 5 \times 10^{-11}$  M), with the exception of

101 IC05 Source 2 and IC07 with  $\text{ATP}_{\text{total}}$  of  $1.8 \times 10^{-10}$  M in Q1 and  $8 \times 10^{-11}$  M in Q4, respectively.

102

103

104

105 **Table S1.** Site and source characteristics and treatment process descriptions

| System name | Source Description                                                                                                          | Additional Treatment (all sites chlorinate)                                                                                                 | Theoretical maximum distribution system residence time (days) <sup>a</sup> | Site Sampling Schedule |           |            |            |
|-------------|-----------------------------------------------------------------------------------------------------------------------------|---------------------------------------------------------------------------------------------------------------------------------------------|----------------------------------------------------------------------------|------------------------|-----------|------------|------------|
|             |                                                                                                                             |                                                                                                                                             |                                                                            | Q1 (A 15)              | Q2 (W 16) | Q3 (Sp 16) | Q4 (Su 16) |
| IC01        | 5 sources, one wellfield (Source05), 3 wells (B-Source01,C-Source02,D-Source03) in active use, all combine before treatment |                                                                                                                                             | 13.7-15.5                                                                  | 9/30/15                | 12/10/15  | 3/10/16    | 6/16/16    |
| IC02        | Single source                                                                                                               |                                                                                                                                             | 5.8-13.4                                                                   | 9/24/15                | 12/10/15  | 3/10/16    | 6/16/16    |
| IC03        | Single source                                                                                                               |                                                                                                                                             | 4.3-9.5                                                                    | -                      | -         | 3/10/16    | 6/16/16    |
| IC04        | Single source                                                                                                               |                                                                                                                                             | 3.6-6.2                                                                    | 9/24/15                | 12/10/15  | 3/10/16    | 6/16/16    |
| IC05        | Two sources at different locations and pump to separate reservoirs, two entry points                                        |                                                                                                                                             | 1.1-10.3                                                                   | 9/24/15                | 12/10/15  | 3/10/16    | 6/16/16    |
| IC06        | 3 sources, two wells on together, one treatment plant and one entry point                                                   | Fe/Mn removal & corrosion control: free chlorine oxidation, greensand filtration, aeration at reservoir inlets.                             | 2.3-3.4                                                                    | 10/6/15                | 12/10/15  | 3/10/16    | 6/16/16    |
| IC07        | Single source                                                                                                               | Fe/Mn removal: free chlorine oxidation, greensand filtration.                                                                               | 6.0-10.7                                                                   | 9/24/15                | 12/10/15  | 3/10/16    | 6/16/16    |
| IC08        | Two sources pump together, one entry point                                                                                  | Fe/Mn removal & softening: permanganate and free chlorine oxidation, greensand filtration, ion exchange, post-filtration free chlorination. | 6.7-9.8                                                                    | 9/24/15                | 12/10/15  | 3/10/16    | 6/16/16    |
| SJC01       | Wellfield of 2 sources                                                                                                      |                                                                                                                                             | 7.9-13.4                                                                   | 9/29/15                | 12/17/15  | 3/8/16     | 6/13/16    |
| SJC02       | Single source                                                                                                               | Aeration tower for TTHM removal                                                                                                             | 5.1-9.3                                                                    | 9/29/15                | 12/17/15  | 3/8/16     | 6/13/16    |
| SJC03       | Two sources at different locations, two entry points                                                                        |                                                                                                                                             | 8.4-16.8                                                                   | 9/29/15                | 12/17/15  | 3/8/16     | 6/13/16    |
| SJC04       | Two sources at different locations, two entry points                                                                        |                                                                                                                                             | 1.2-11.2                                                                   |                        | 12/17/15  | 3/8/16     | 6/13/16    |
| SJC05       | Single source                                                                                                               |                                                                                                                                             | 4.9-7.6                                                                    | 9/29/15                | 12/17/15  | 3/8/16     | 6/13/16    |
| SJC06       | Single source                                                                                                               |                                                                                                                                             | 7.0-10.9                                                                   | 9/29/15                | 12/17/15  | 3/8/16     | 6/13/16    |
| SJC07       | Single source                                                                                                               |                                                                                                                                             | 4.3-6.1                                                                    | 9/29/15                | 12/17/15  | 3/8/16     | 6/13/16    |

106 <sup>a</sup> Theoretical detention times were calculated by dividing total distribution system storage volume by average water  
 107 volume treated per day for each month that samples were collected (Sept., Dec., March, and June).

108 **Table S2.** Designated components for the 4-component PARAFAC model developed from Q1-4  
 109 IC and SJC samples

| Component | Ex./Em. maxima             |                            | Probable character/origin                                                        | DBP relevance                               | Analogues from previous work                                                                |
|-----------|----------------------------|----------------------------|----------------------------------------------------------------------------------|---------------------------------------------|---------------------------------------------------------------------------------------------|
|           | $\lambda_{\text{ex}}$ (nm) | $\lambda_{\text{em}}$ (nm) |                                                                                  |                                             |                                                                                             |
| 1         | 250, 370                   | 460                        | Terrestrial humic-like <sup>a</sup>                                              | THM and HAA precursor (strongly correlated) | C4 <sup>4</sup><br>C2 <sup>5</sup><br>C1 <sup>6</sup><br>C1 <sup>7</sup><br>C2 <sup>8</sup> |
| 2         | 250, 330                   | 400                        | Terrestrial/anthropogenic humic-like <sup>b</sup>                                | THM and HAA precursor                       | C1 <sup>4</sup><br>C3 <sup>5</sup><br>C2 <sup>6</sup><br>C2 <sup>7</sup><br>C3 <sup>8</sup> |
| 3         | 260, 410                   | 510                        | Humic-like <sup>c</sup>                                                          | THM and HAA precursor                       | C4 <sup>4</sup><br>C2 <sup>5</sup>                                                          |
| 4         | 245                        | 390                        | Protein/amino acids, tryptophan-like (possibly microbially-derived) <sup>d</sup> | -                                           | C2 <sup>4</sup><br>C4 <sup>6</sup><br>C4 <sup>8</sup>                                       |

110 <sup>a</sup>Components likely associated with constituents exhibiting characteristics typical of terrestrial humic substances –  
 111 i.e., complex macromolecular products resulting from the chemical and/or microbial decay/transformation of  
 112 vegetative and microbial biomass in terrestrial ecosystems (e.g., grasslands, forests, wetlands), <sup>b</sup>Components likely  
 113 associated with constituents comprising a mixture of humic substances of natural terrestrial origin and chemically-  
 114 similar substances originating from anthropogenic sources (e.g., municipal or industrial wastewater, septic leachate),  
 115 <sup>c</sup>Components likely associated with constituents exhibiting characteristics of broadly-defined humic substances  
 116 without distinguishing traits of either natural terrestrial or anthropogenic origin, <sup>d</sup>Components likely associated with  
 117 biomolecules generated during microbial growth (e.g., amino acids, proteins) with fluorescence signatures similar to  
 118 tryptophan.

119

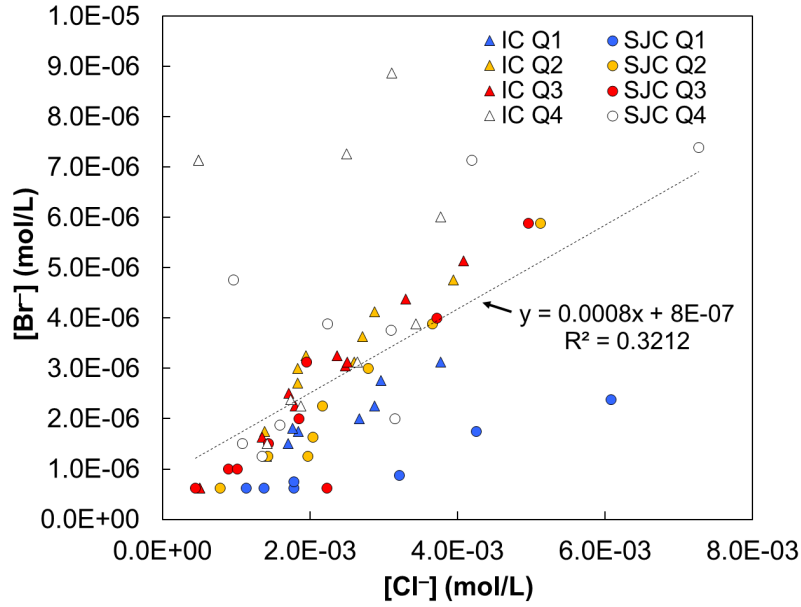

120  
121  
122  
123

**Figure S1.** Bromide concentration versus chloride concentration for all raw water samples collected during the study for each site.

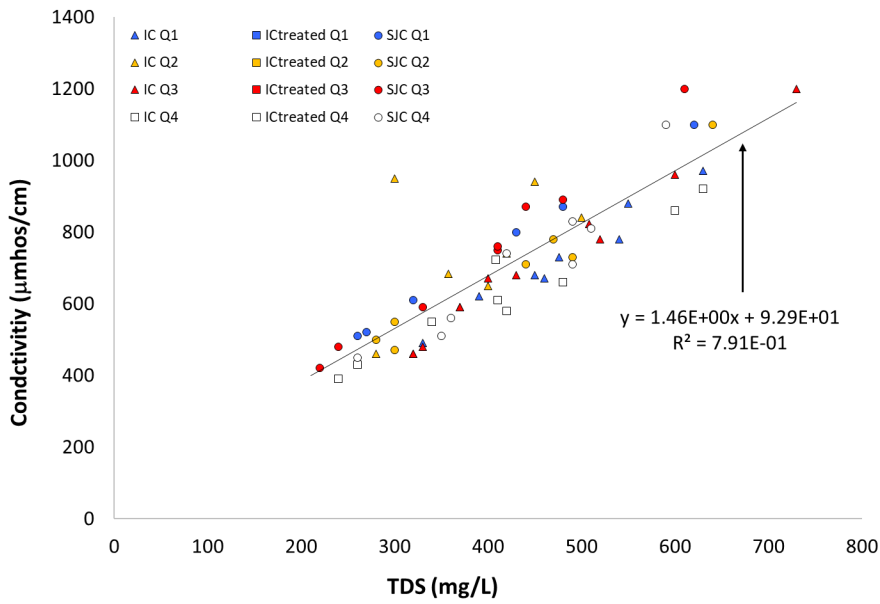

124  
125  
126  
127  
128  
129

**Figure S2.** Conductivity versus total dissolved solids (TDS) of the source waters for all four quarters.



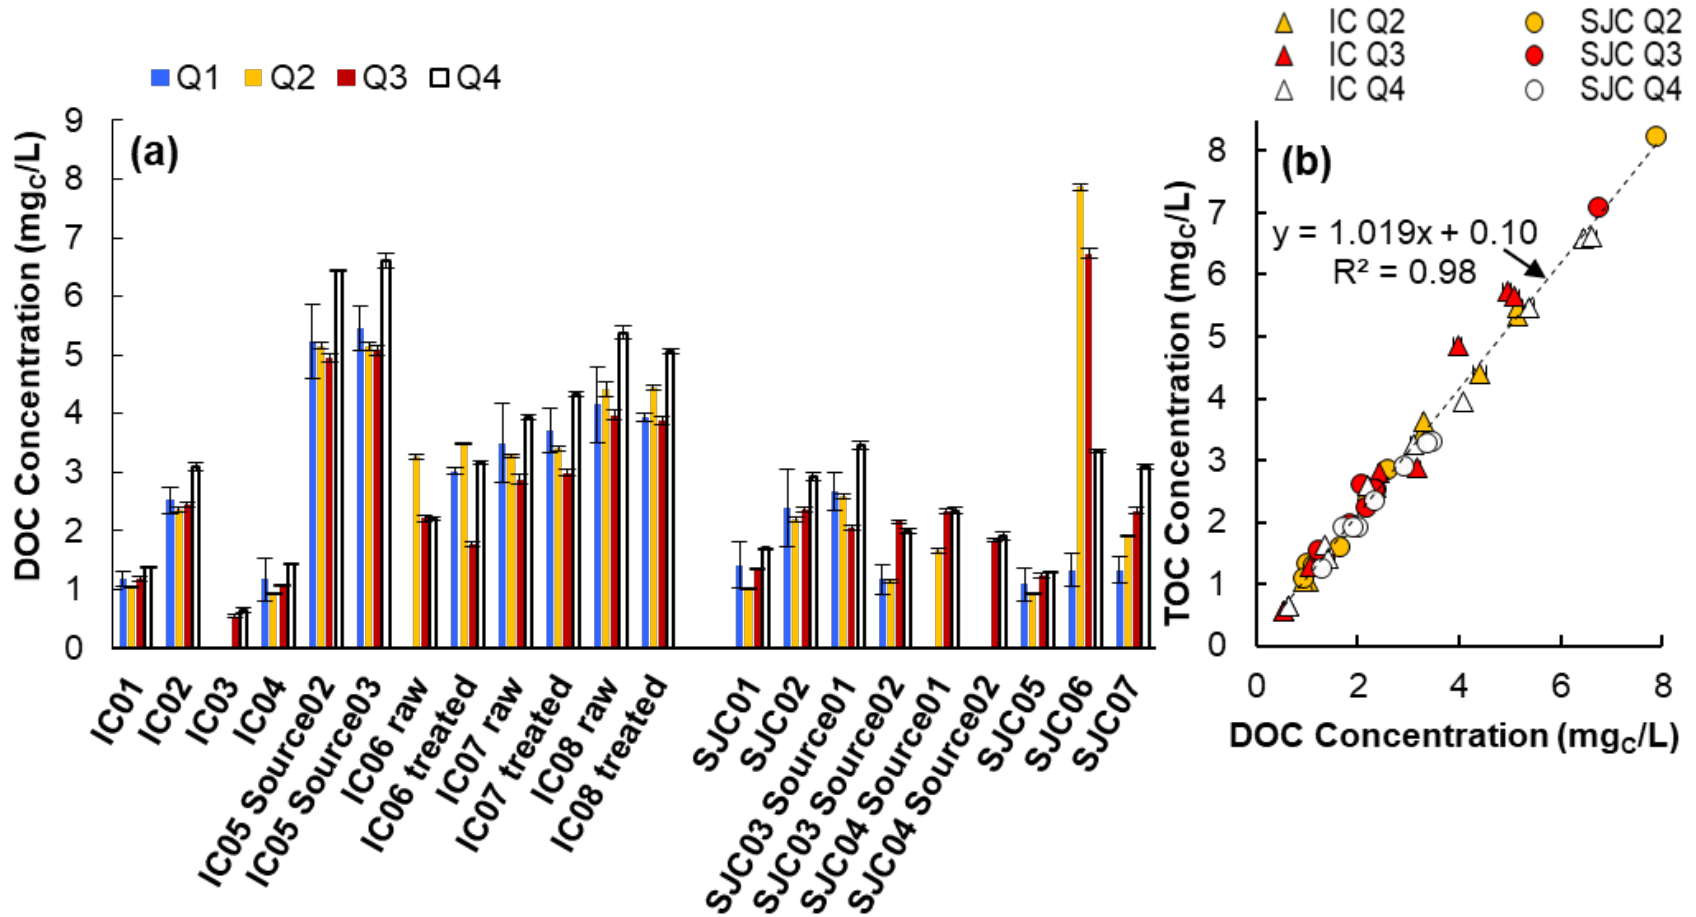

130

131 **Figure S3.** (a) DOC concentrations (Q1–4), and (b) correlation of TOC and DOC concentrations (Q2–4) for IC and SJC samples. Data  
 132 values and error bars represent means and standard deviations, respectively, obtained from duplicate measurements.

133

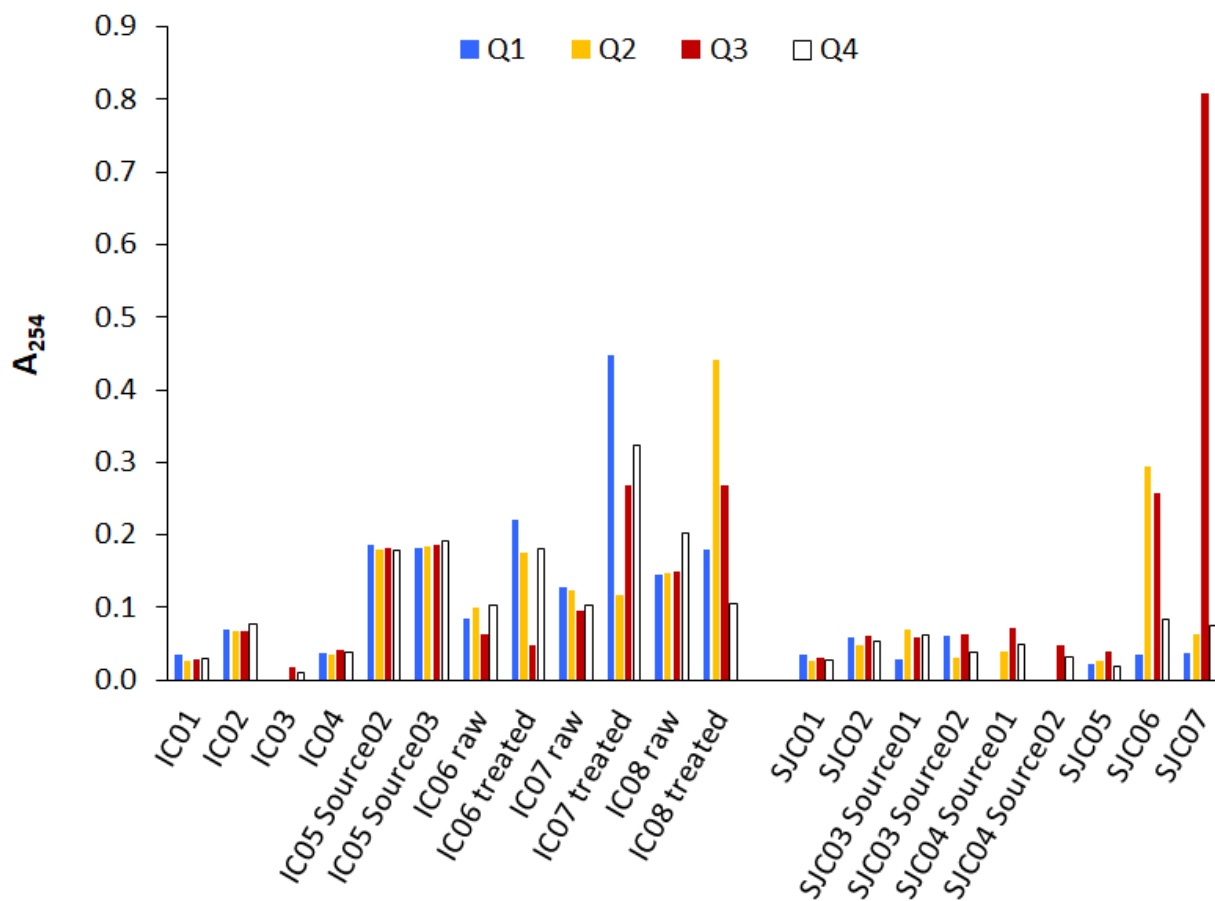

134

135 **Figure S4.**  $A_{254}$  measurements (Q1–4) for IC and SJC samples.

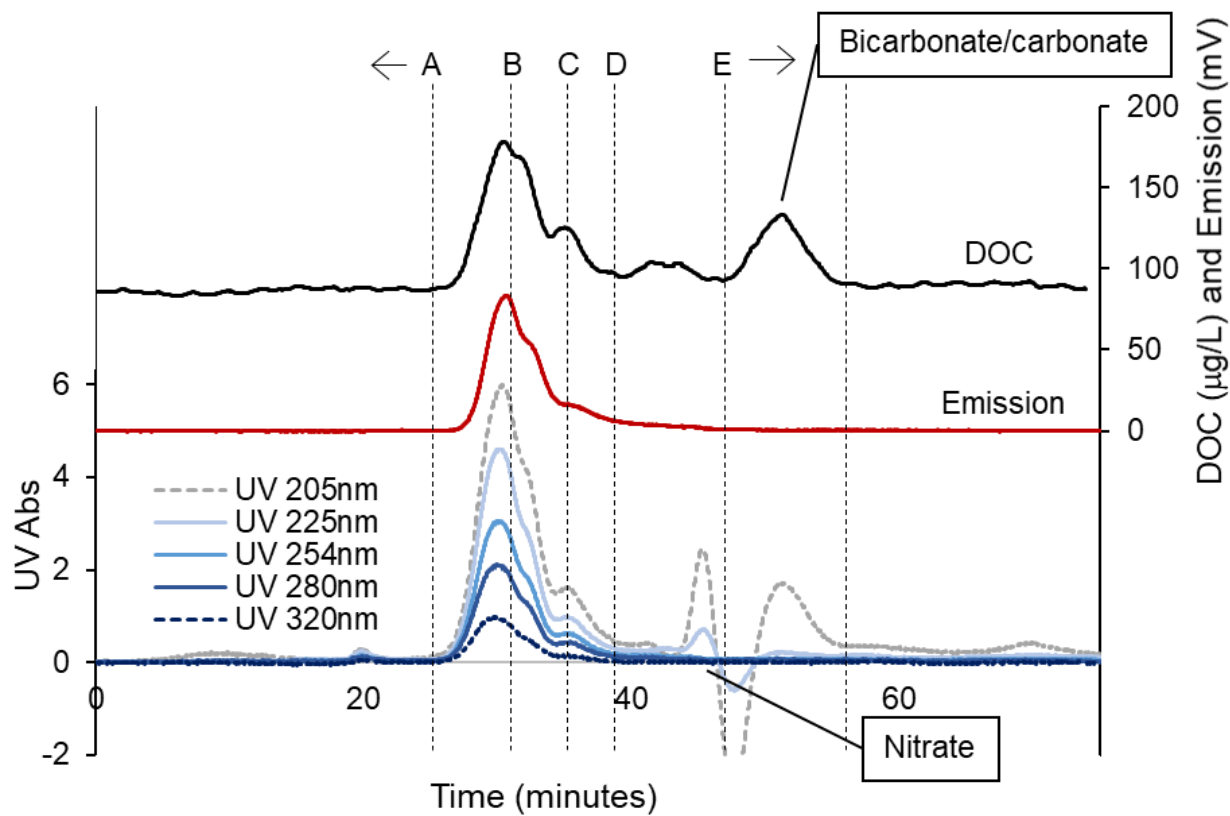

136

137 **Figure S5.** Example SEC chromatogram of IC05 Source03 from quarter 3 (note that the DOC  
 138 and fluorescence emission chromatograms provided are plotted against the secondary y-axis,  
 139 right-side).

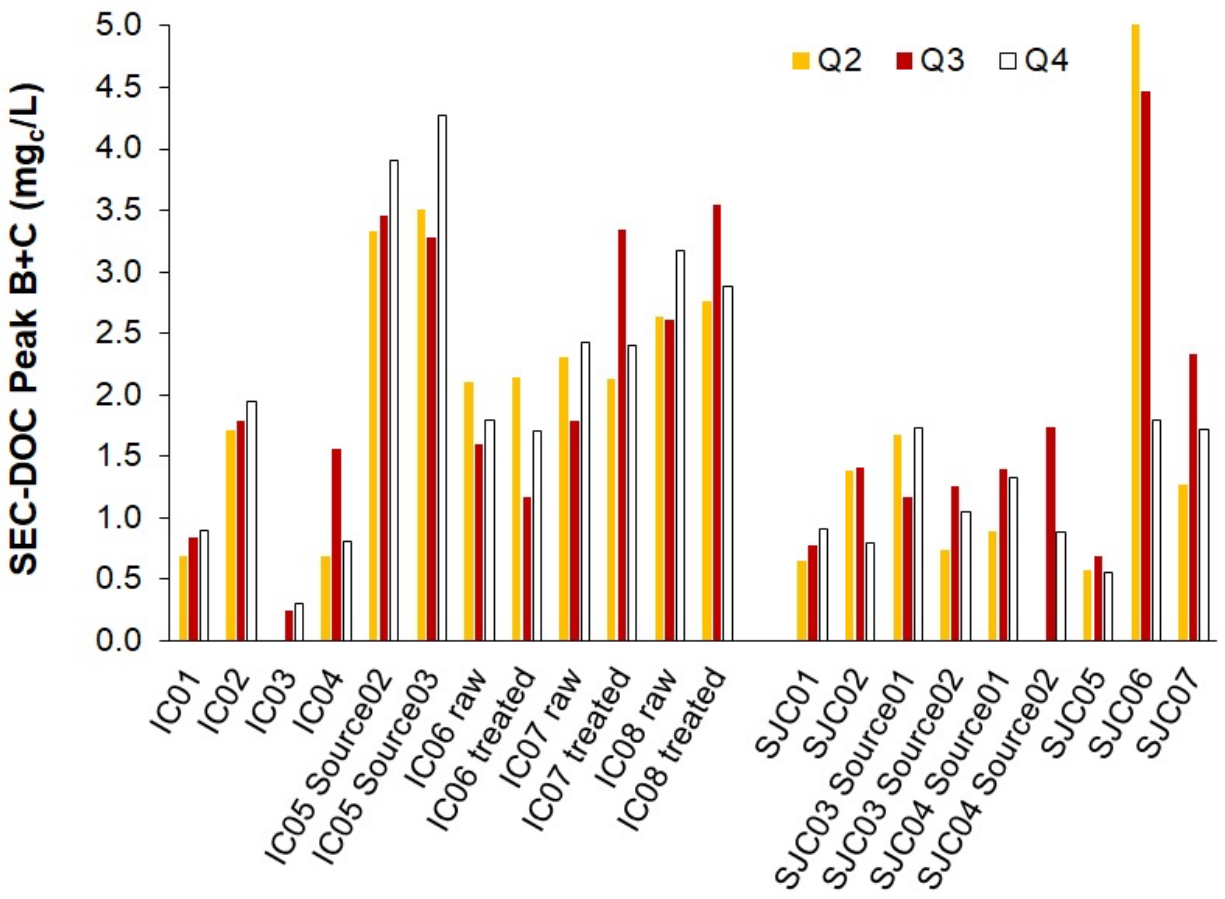

140

141 **Figure S6.** SEC-DOC Peak B+C concentration measurements (Q2–4) for IC and SJC samples.

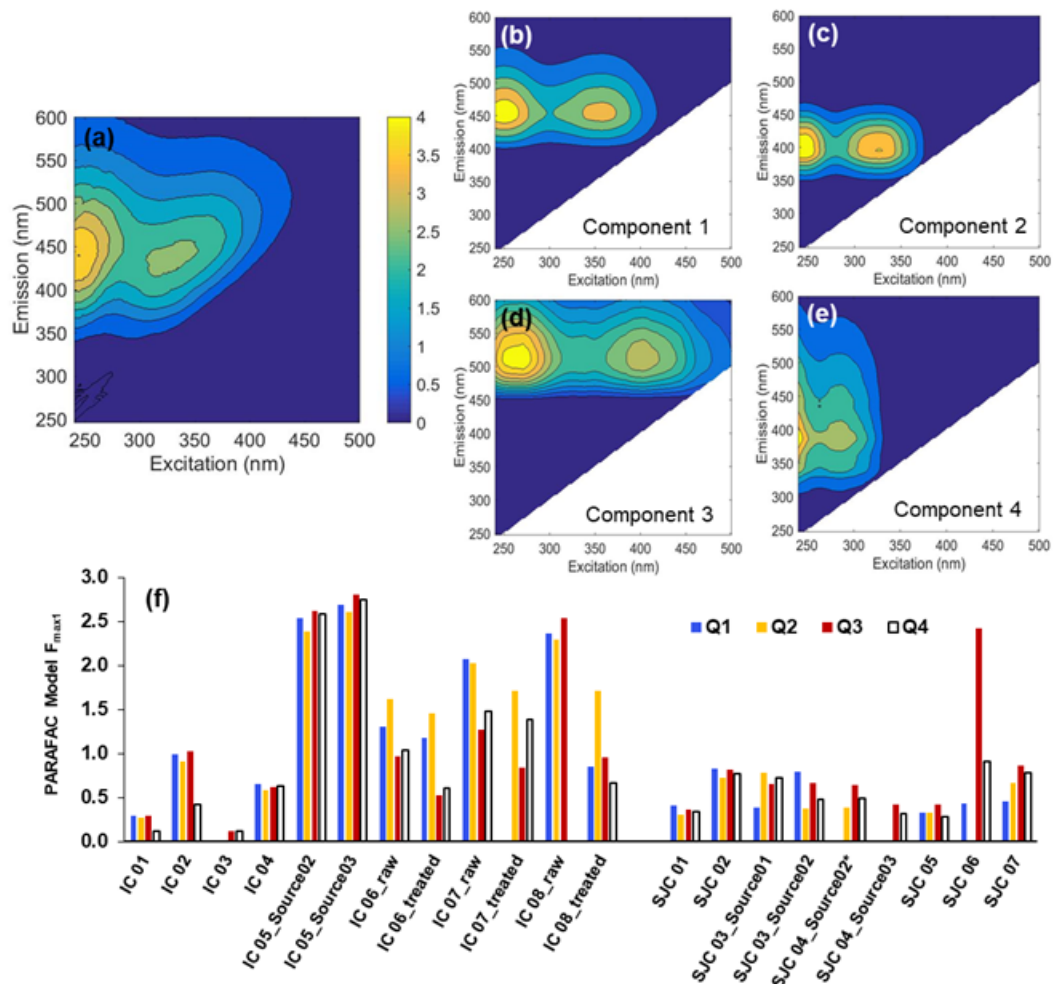

142

143 **Figure S7.** (a) Representative measured fluorescence EEM, obtained for the Q3 IC05 Source03  
 144 raw water sample; (b)-(e) EEM fluorescence spectra for Components 1-4 as defined in the  
 145 PARAFAC model; and (f)  $F_{max1}$  values corresponding to Component 1, generated for each  
 146 sample by the PARAFAC model.

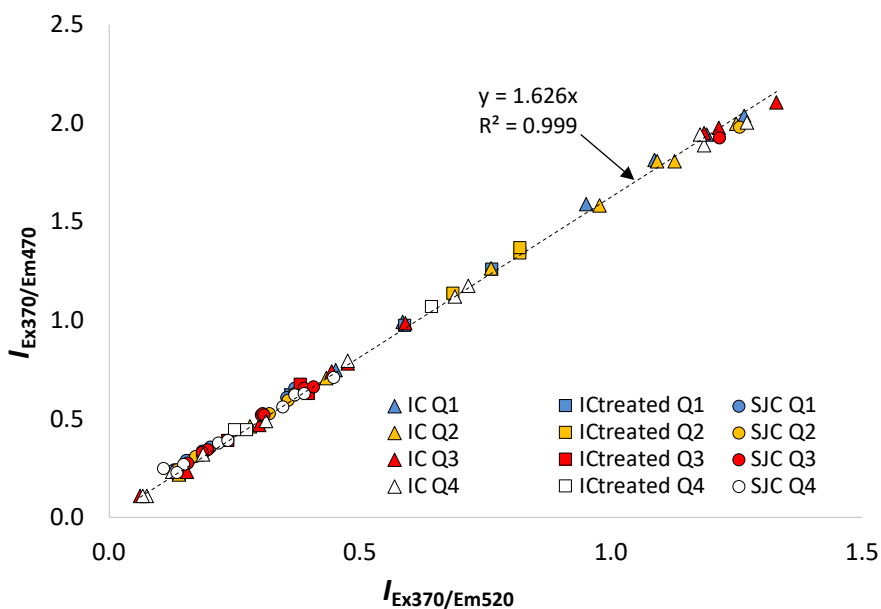

147  
 148 **Figure S8.** Magnitude of fluorescence emission intensity at  $\lambda_{em} = 470$  nm versus emission  
 149 intensity at  $\lambda_{em} = 520$  nm (both at an excitation wavelength,  $\lambda_{ex} = 370$  nm) for each sample. The  
 150 average fluorescence index across the sample set (i.e., the ratio of the former to the latter<sup>9, 10</sup>),  
 151 was calculated from the slope of the line resulting from least squares regression of the dataset.

152

153

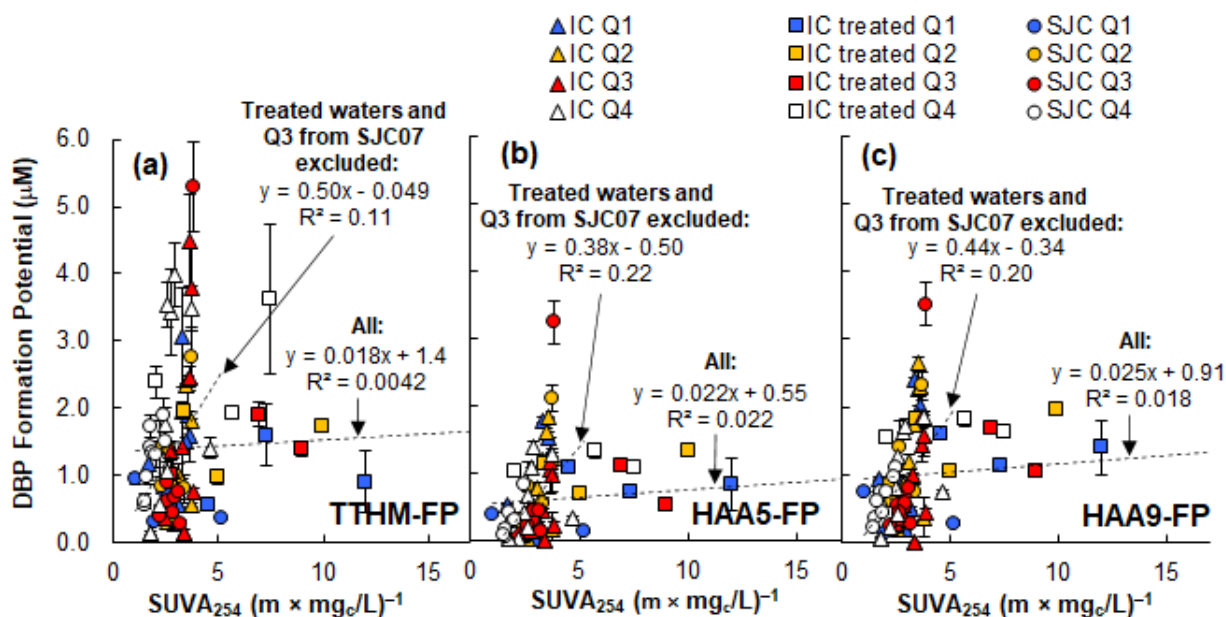

154  
 155 **Figure S9.** (a) TTHM-FP; (b) HAA5-FP and; (c) HAA9-FP plotted versus  $SUVA_{254}$ . Data points  
 156 and error bars represent means and standard deviations, respectively, obtained from at least  
 157 duplicate (and typically triplicate) experimentally-independent measurements.

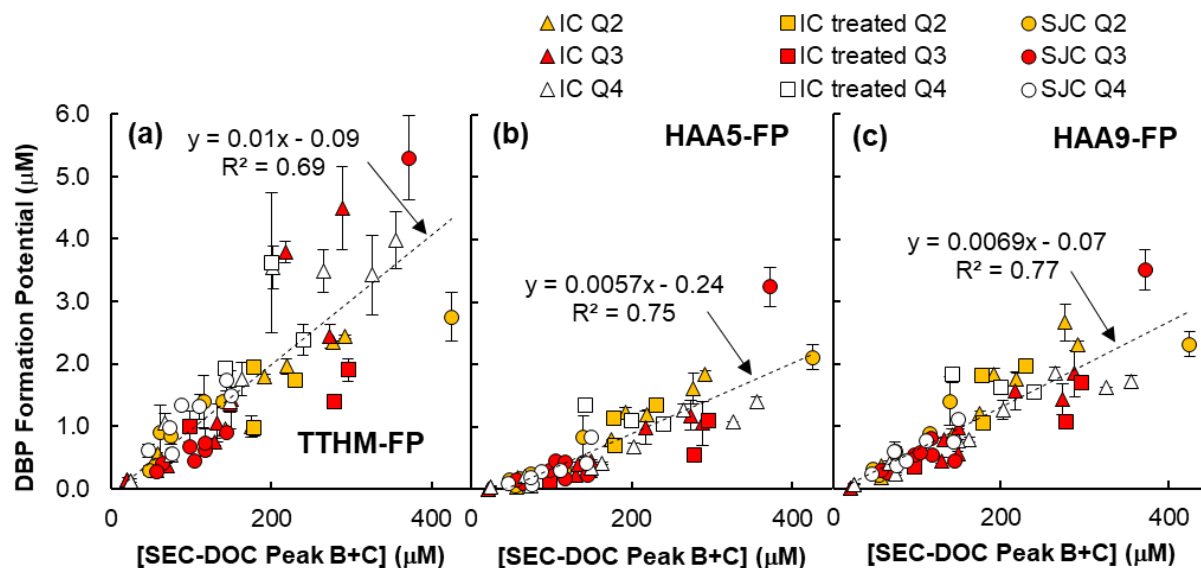

158  
 159 **Figure S10.** (a) TTHM-FP; (b) HAA5-FP and; (c) HAA9-FP plotted versus [SEC-DOC Peak  
 160 B+C]. Data points and error bars represent means and standard deviations, respectively, obtained  
 161 from at least duplicate (and typically triplicate) experimentally-independent measurements.  
 162  
 163

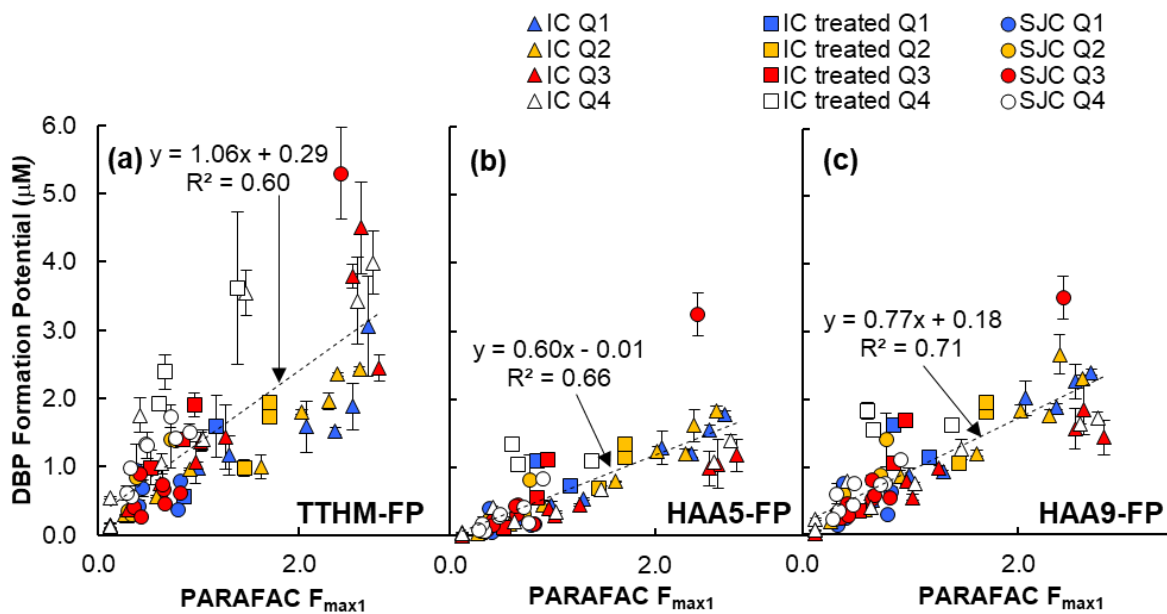

164  
 165 **Figure S11.** (a) TTHM-FP; (b) HAA5-FP and; (c) HAA9-FP plotted versus  $F_{max1}$  values  
 166 generated by the PARAFAC model. Measurements of  $F_{max1}$  were obtained at native sample pH.  
 167 Data points and error bars represent means and standard deviations, respectively, obtained from  
 168 at least duplicate (and typically triplicate) experimentally-independent measurements.  
 169

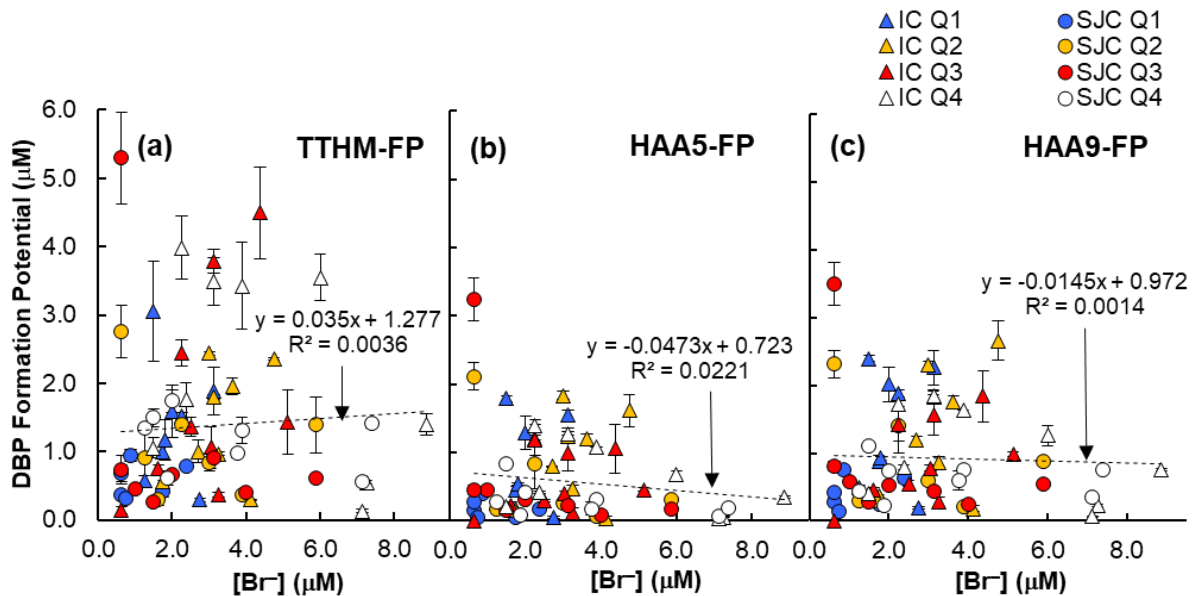

170  
 171 **Figure S12.** (a) TTHM-FP; (b) HAA5-FP; and (c) HAA9-FP plotted versus  $[Br^-]$  in raw water  
 172 samples.

173

174

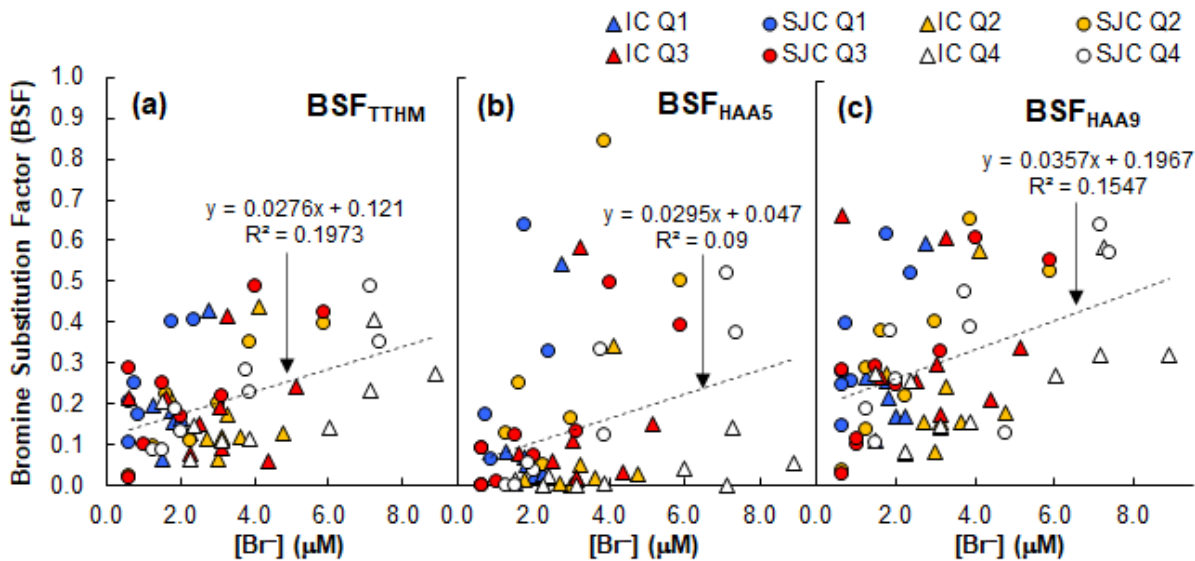

175  
 176 **Figure S13.** (a)  $BSF_{TTHM}$ ; (b)  $BSF_{HAA5}$ ; (c)  $BSF_{HAA9}$  plotted versus  $[Br^-]$  in raw water samples.

177

178



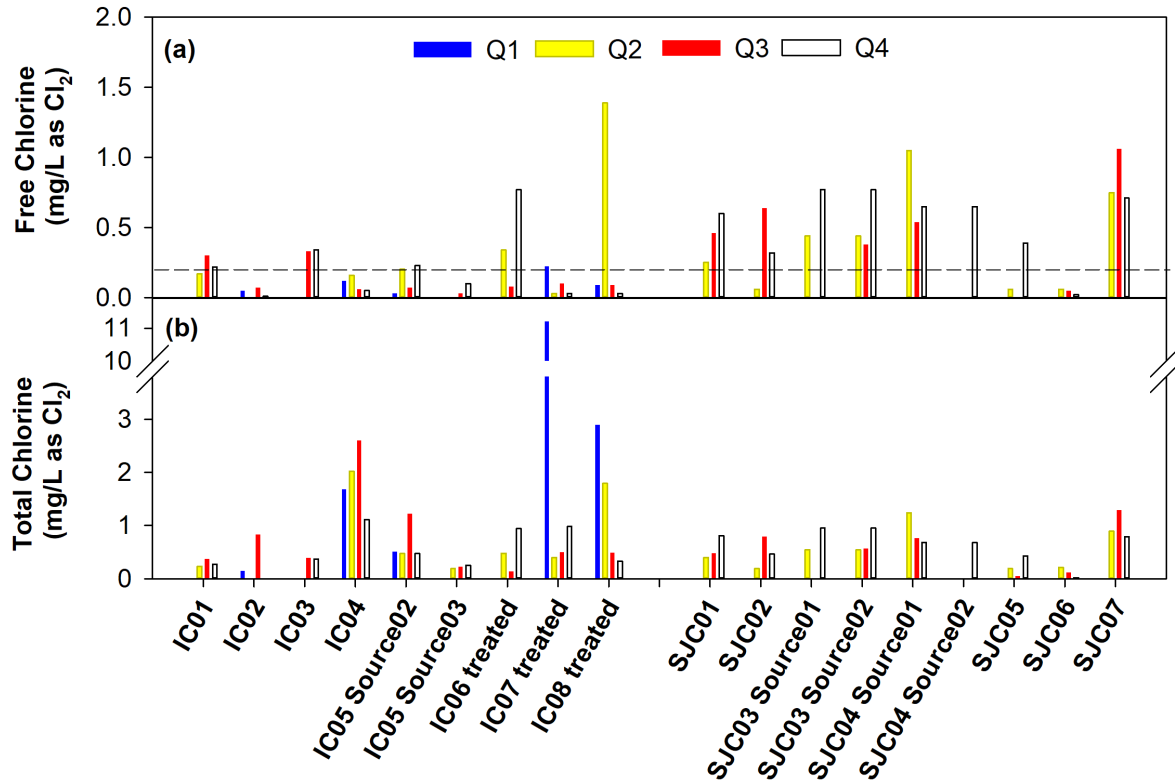

179

180 **Figure S14.** (a) Average free chlorine residuals (black dashed line is 0.2 mg/L as Cl<sub>2</sub>); and (b)  
 181 average total chlorine residuals following full-scale chlorination at each site. Note the break in  
 182 the y-axis in panel (b), which only applies to Q1 for source IC06.

183

184 **References**

- 185 1. F. Hammes, F. Goldschmidt, M. Vital, Y. Y. Wang, T. Egli, Measurement and  
186 interpretation of microbial adenosine tri-phosphate (ATP) in aquatic environments, *Water*  
187 *Res.*, 2010, 44(13), 3915-23.
- 188 2. C. A. Stedmon, R. Bro, Characterizing dissolved organic matter fluorescence with parallel  
189 factor analysis: a tutorial, *Limnol. Oceanogr.: Methods*, 2008, 6(572-9).
- 190 3. Sentry Internet - Washington State Water System Data [Internet]. Available from:  
191 <https://fortress.wa.gov/doh/eh/portal/odw/si/Intro.aspx>.
- 192 4. A. D. Pifer, J. L. Fairey, Improving on SUVA 254 using fluorescence-PARAFAC analysis  
193 and asymmetric flow-field flow fractionation for assessing disinfection byproduct  
194 formation and control, *Water Res.*, 2012, 46(9), 2927-36.
- 195 5. S. K. Ishii, T. H. Boyer, Behavior of reoccurring PARAFAC components in fluorescent  
196 dissolved organic matter in natural and engineered systems: a critical review, *Environ. Sci.*  
197 *Technol.*, 2012, 46(4), 2006-17.
- 198 6. S. Baghoth, S. Sharma, G. Amy, Tracking natural organic matter (NOM) in a drinking  
199 water treatment plant using fluorescence excitation–emission matrices and PARAFAC,  
200 *Water Res.*, 2011, 45(2), 797-809.
- 201 7. D. W. Johnstone, N. P. Sanchez, C. M. Miller, Parallel factor analysis of excitation–  
202 emission matrices to assess drinking water disinfection byproduct formation during a peak  
203 formation period, *Environmental Engineering Science*, 2009, 26(10), 1551-9.
- 204 8. K. M. Beggs, R. S. Summers, Character and chlorine reactivity of dissolved organic matter  
205 from a mountain pine beetle impacted watershed, *Environ. Sci. Technol.*, 2011, 45(13),  
206 5717-24.

- 207 9. R. M. Cory, M. P. Miller, D. M. McKnight, J. J. Guerard, P. L. Miller, Effect of  
208 instrument-specific response on the analysis of fulvic acid fluorescence spectra, *Limnol.*  
209 *Oceanogr.: Methods*, 2010, 8(2), 67-78.
- 210 10. D. M. McKnight, E. W. Boyer, P. K. Westerhoff, P. T. Doran, T. Kulbe, et al.,  
211 Spectrofluorometric characterization of dissolved organic matter for indication of precursor  
212 organic material and aromaticity, *Limnol. Oceanogr.*, 2001, 46(1), 38-48.
- 213
